# Supplementary material
Source: PubMed Central journal article supplement (PMC3259650)
Supplement: supp_M800712200_SupplInf4.pdf [file supp_M800712200_SupplInf4.pdf]

## Supplementary information

**Table 1. Oligonucleotide sequences for PCR and *in vitro* site-directed mutagenesis.**

Start codons are in italic. Restriction enzyme sites for cloning or those introduced by silent mutations for identifying mutant clones are underlined. Mutations are marked with lowercase letters.

| Primer                | Sequence (5' → 3')                                              | Restriction enzyme |
|-----------------------|-----------------------------------------------------------------|--------------------|
| Xen-s                 | AATTCGAACCTAAGGAAGCTTCGCGATCCGGACCTTGGCATGCAGATC                | not shown          |
| Xen-a                 | TCGAGATCTGCATGCCAAGGTCCGGATCGCGAAGCTTCCTTAGGTTCCG               | not shown          |
| pQ-s                  | CTTGAGCATCAGCAGCAACAGCAACAGCAGCAGCAA                            | -                  |
| pQ-a                  | CAAGTTGCTGCTGCTGTTGCTGTTGCTGCTGATGCT                            | -                  |
| mTRESK-s              | ATCGAATTC <del>CAAGAGG</del> ATGGAGGCTGAGG                      | EcoRI              |
| mTRESK-a              | CCTGGTCCGGACCCCAAGGTAGCGAAACTTCCCTTTG                           | Kpn2I              |
| h14-3-3 $\eta$ -s     | GGGGGGGCATGCAGATGGGGGACCGGGAGCAGCTG                             | PaeI               |
| h14-3-3 $\eta$ -a     | GTGCTCGAGTCAGTTGCCTTCTCCTGCTTCTTCATC                            | XhoI               |
| m14-3-3 $\beta$ -s    | GCGGAATTCCTCCGCAAAAATGACCATG                                    | EcoRI              |
| m14-3-3 $\beta$ -a    | GCGCTCGAGTTAGTTCTCTCCCTCTCCAGCATC                               | XhoI               |
| m14-3-3 $\gamma$ -s   | GCGGAATTCAGCCCTGTGAAGAATGGTGG                                   | EcoRI              |
| m14-3-3 $\gamma$ -a   | GCGCTCGAGCACCTGGGGCCTTAGTTGTTGC                                 | XhoI               |
| m14-3-3 $\epsilon$ -s | GCGGAATTCGCTGCCGCAATGGATGATC                                    | EcoRI              |
| m14-3-3 $\epsilon$ -a | GCGCTCGAGTCACTGATTCTCATCTCCACATCC                               | XhoI               |
| m14-3-3 $\zeta$ -s    | GCGGAATTC <del>CCACTCCGGACACAGAATATCAG</del>                    | EcoRI              |
| m14-3-3 $\zeta$ -a    | ATACCGTCGACGGCCGGTTAATTTTCCCTCC                                 | Sall               |
| m14-3-3 $\sigma$ -s   | GCGGAATTCCTCGCAGTCA7GGAGAGAG                                    | EcoRI              |
| m14-3-3 $\sigma$ -a   | GCGCTCGAGTCACTCTGGGGCTCCTCCG                                    | XhoI               |
| m14-3-3 $\tau$ -s     | GCGGAATTCGCTCGCCATGGAGAAGACC                                    | EcoRI              |
| m14-3-3 $\tau$ -a     | ATACCGTCGACTTAGTTTTCGGCCCTCTGCTG                                | Sall               |
| $\beta$ -R58,62A-s    | GTGGTAGGTGCCCGggcCTCTTCCTGGgcTGTCTATCTCCAGCATC                  | SmaI               |
| $\gamma$ -R57,61A-s   | GGTGGGGCTCGCgctagCTCCTGGgcGGTCATCAGCAGCATC                      | NheI               |
| $\epsilon$ -R57,61A-s | TGATTGGAGCCAGAgcgGCgTCCTGGgcAATAATCAGCAGCATTG                   | BglI               |
| $\zeta$ -R56,60A-s    | GTTGTAGGAGCCCGggcGTCATCGTGGgcGGTCTGCTCAAGTATTG                  | SmaI               |
| $\sigma$ -R56,60As    | GGTGGCGGCCAGgcgGCcGCTGGgcGGTCTGTCCAGCATC                        | NotI               |
| $\tau$ -R56,60A-s     | GTAGGGGGCCCGcctagCGCCTGGgcGGTCATCTCGAGCATTG                     | NheI               |
| mTRloop-s             | CAGGACCATGGGCCACGATATCTTCAAATGGCGC                              | NcoI               |
| mTRloop-H8-a1         | ATGATGATGATGGTCCAGACGCTCCACCTGCTGGCCAC                          | -                  |
| mTRloop-H8-a2         | GCGCTCGAGTCAATGATGATGATGATGATGATGGTCCAGACG                      | XhoI               |
| mTR-S192A-s           | CTTCAAATGGCGagCtCTCCCCTCTGC                                     | SacI               |
| mTR-S202A-s           | GGAAGCAGCCTGACgC <del>CAAACCGGTGGAGGAAG</del>                   | Hin1I, BstXI       |
| mTR-S227,232,234A-s   | AACCCGACGCCg <del>gC</del> CAAGGACCCCCCGCTCCGgcaTGCAATGTGGAGCTG | PdII, PaeI         |
| mTR-T256A-s           | GAACAAGCTACAACCGCCg <del>CG</del> CGTCCCGTGGAG                  | PdII               |
| mTR-T256A,S262A-s     | CTACAACCACCGCGCTCCCGTGGAGAGGgcCAACTCCTGTCCCGAG                  | ( $\Delta$ MluI)   |
| mTR-S262,264A-s       | CGCGTCCCGTGGAGcGcg <del>CAAt</del> CCTGTCCCGAGCTGG              | BssHII, BsmI       |
| mTR-S274,(279)A-s     | CTGGTCTGGGGCGg <del>CT</del> agCCTGTTCTATTCTCGC                 | NheI               |
| mTR-S279A-s           | CCTGTTCTATTCTCg <del>CAAT</del> CTGGATGAAGTGG                   | Bsp68I             |
| mTR-S274,276,279A-s   | CTGGGGCGACTGgCaTGcgCTATTCTCg <del>CAAT</del> CTGGATGAAGTGG      | PaeI, Bsp68I       |

### Supplementary Figure S1.

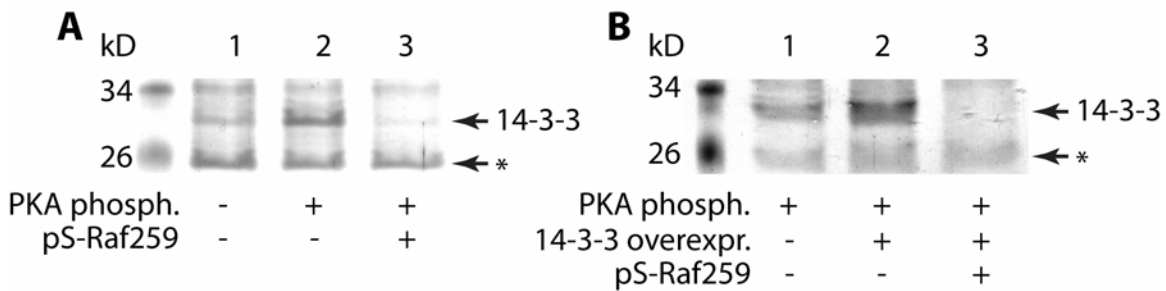

We examined whether the interaction of endogenous *Xenopus* 14-3-3 with TRESK could be biochemically verified, whether the 14-3-3 level remained high for 3 days after the microinjection of 14-3-3 cRNA, and whether pS-Raf259 competed with TRESK for the binding to (endogenous and overexpressed) 14-3-3 present in the *Xenopus* oocyte cytosol.

His-tag pulldown experiments were performed (similarly as in Fig. 5. D-F) with cytosol extracts prepared from *Xenopus laevis* ovarian lobes (Panel A) or oocytes (Panel B, 100 oocytes/lane). The cytosols were incubated with ‘wild type’ TRESKloop-H<sub>8</sub> immobilized on Ni-NTA resin (see the *Experimental procedures*).

**A.** The endogenous *Xenopus* 14-3-3 protein (molecular weight between 26 and 34 kD) was pulled down with PKA-phosphorylated TRESKloop-H<sub>8</sub> protein from the cytosol extract of *Xenopus* ovarian lobes (*lane 2*). The interaction was phosphorylation-dependent, since the pulldown of 14-3-3 was much smaller with non-phosphorylated TRESKloop-H<sub>8</sub> (*lane 1*). In the presence of pS-Raf259 (600  $\mu$ M), the pulldown of endogenous 14-3-3 was prevented (*lane 3*). (Several contaminating protein bands, binding non-specifically to the Ni-NTA resin, are also visible; one being especially prominent at 26 kD, marked with an *arrow* and an *asterisk*.)

**B.** The endogenous *Xenopus* 14-3-3 protein was also pulled down with PKA-phosphorylated TRESKloop-H<sub>8</sub> protein from the cytosol extract of 100 non-injected oocytes (*lane 1*). If the oocytes were microinjected with 14-3-3 $\eta$  cRNA (identical quantity as used in the electrophysiological experiments) 3 days before the preparation of the cytosol, then more 14-3-3 was pulled down than from the non-injected oocytes (*lane 2*). The addition of pS-Raf259 (600  $\mu$ M) eliminated the binding of both the endogenous and overexpressed 14-3-3 (*lane 3*).

The endogenous *Xenopus* 14-3-3 bound phosphorylation-dependently to the intracellular loop of mouse TRESK (similarly to the recombinant 14-3-3 fusion proteins expressed in *E.coli*.) The 14-3-3 level in the cRNA-injected cells exceeded that of the non-injected cells 3 days after the microinjection. The pS-Raf259 phosphopeptide prevented the binding of the (endogenous and overexpressed) 14-3-3 to TRESK.

## Supplementary Figure S2.

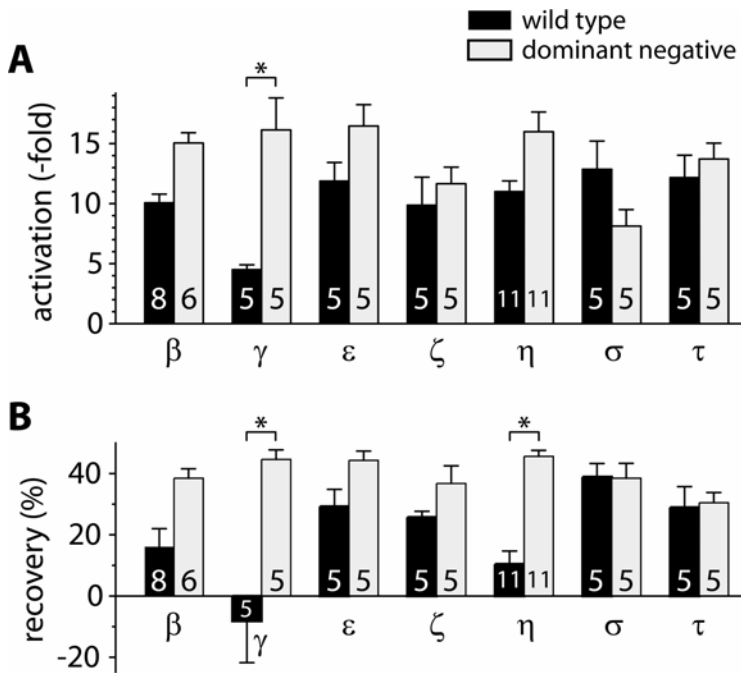

### The effects of the different 14-3-3 isoforms on the calcium-dependent regulation of TRESK.

**A.** Activation of the  $K^+$  current in response to ionomycin (measured as detailed in Fig. 1.A) in oocytes coexpressing different wild type (*black* columns) or dominant negative (*gray* columns) 14-3-3 isoforms (as indicated by *Greek letters* below the panel) with mouse TRESK. **B.** Recovery of the  $K^+$  current after a washout period of 5 minutes in the same cells as in A. (The negative recovery ( $\gamma$  isoform) indicates that the current was even larger at the end of the washout period than immediately after the ionomycin stimulation. The data for the human  $\eta$  isoform were pooled and repeated from Fig. 1.B-E.)
